# Supplementary material
Source: PubMed Central journal article supplement (PMC3578573)
Supplement: ismej2012136x1.pdf [file ismej2012136x1.pdf]

## Supplementary material

### A metabolic model for members of the genus *Tetrasphaera* involved in enhanced biological phosphorus removal

Rikke Kristiansen<sup>1</sup>, Hien Thi Thu Nguyen<sup>1</sup>, Aaron Marc Saunders<sup>1</sup>, Jeppe Lund Nielsen<sup>1</sup>, Reinhard Wimmer<sup>1</sup>, Vang Quy Le<sup>1</sup>, Simon Jon McIlroy<sup>1,2</sup>, Steve Petrovski<sup>2</sup>, Robert J. Seviour<sup>2</sup>, Alexandra Calteau<sup>3</sup>, Kåre Lehmann Nielsen<sup>1</sup>, Per Halkjær Nielsen<sup>1</sup>

<sup>1</sup>Department of Biotechnology, Chemistry, and Environmental Engineering, Aalborg University, Aalborg, Denmark

<sup>2</sup>Biotechnology Research Centre, La Trobe University, Bendigo, Vic 3552, Australia

<sup>3</sup>CEA/DSV/IG, Genoscope & CNRS-UNS 8030, LABGeM, Evry, France

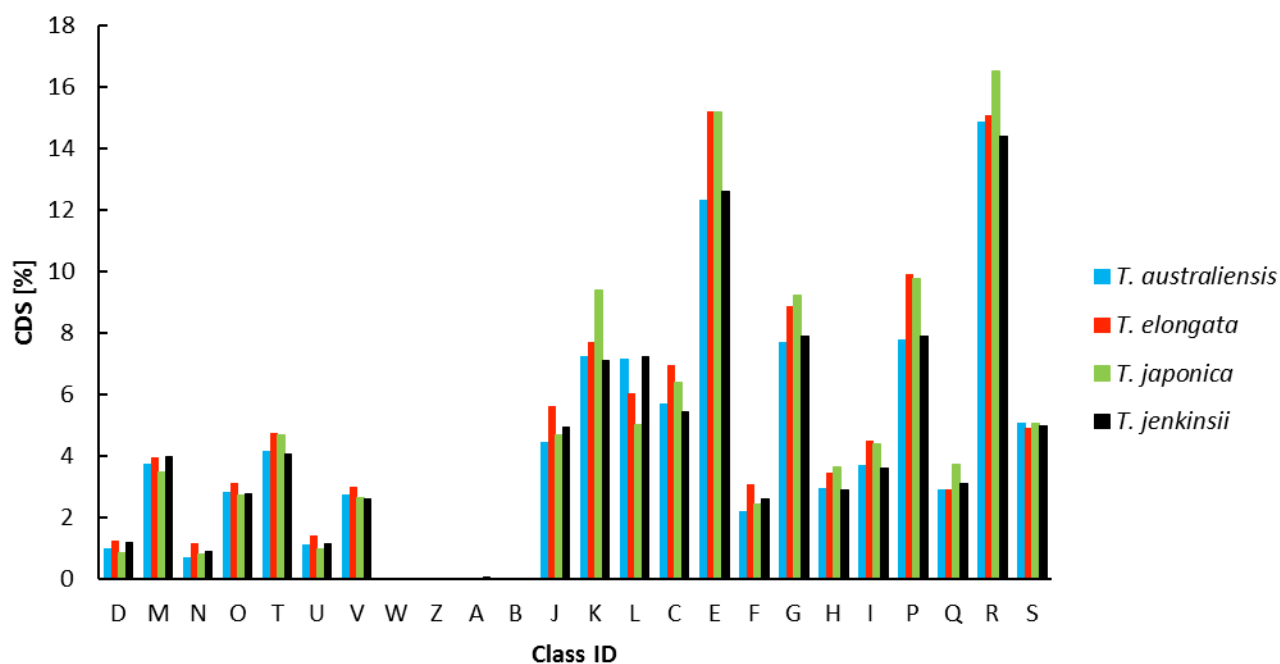

Figure S 1: The Clusters of Orthologous Groups of proteins classification of all CDSs in four studied *Tetrasphaera* isolates (*T. australiensis*, *T. elongata*, *T. japonica*, and *T. jenkinsii*). The distribution of CDSs in each class is given in percentage of the total number of CDSs for a given *Tetrasphaera* isolate.

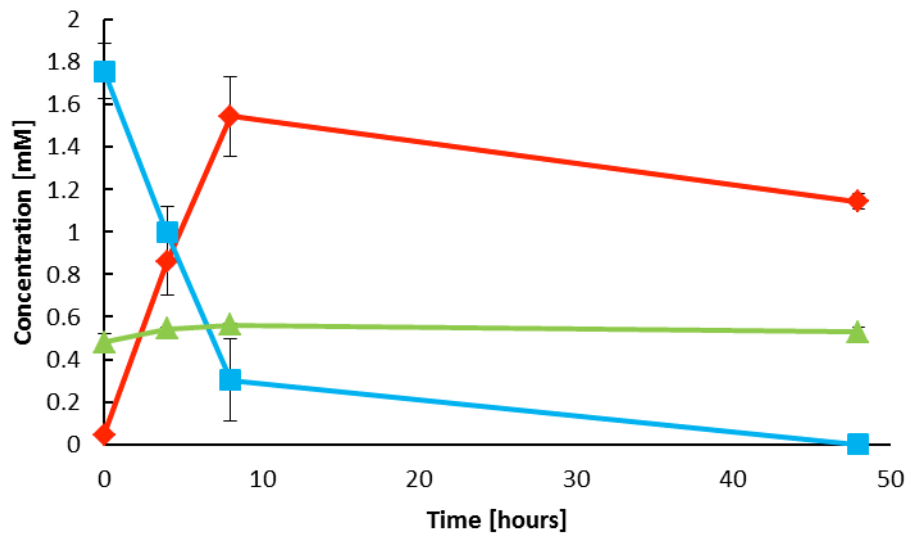

Figure S2: The ability of *Tetrasphaera* to reduce nitrite and nitrate. The average concentration from duplicate experiments of nitrite (red diamonds), nitrate (blue squares), and ammonium (green triangles) are shown when nitrate is added to a *T. japonica* culture. The concentrations are shown with standard deviations.

Table S1: Table with all genes of special interests

| No.                    | Gene                        | Protein                                                   | EC number | <i>Accumulibacter</i>                        | <i>T. australiensis</i>                      | <i>T. elongata</i>         | <i>T. jenkisnii</i> | <i>T. japonica</i>           |
|------------------------|-----------------------------|-----------------------------------------------------------|-----------|----------------------------------------------|----------------------------------------------|----------------------------|---------------------|------------------------------|
| <b>Glycolysis</b>      |                             |                                                           |           |                                              |                                              |                            |                     |                              |
| 1                      | <i>glcK</i><br><i>glkA</i>  | Glucokinase                                               | 2.7.1.2   | -                                            | BN11_3210003                                 | BN10_360033                | BN13_230016         | BN12_2220003                 |
| 2                      | <i>ppgK</i>                 | Polyphosphate glucokinase                                 | 2.7.1.63  | -                                            | BN11_900007                                  | BN10_730009                | BN13_770043         | BN12_1040007<br>BN12_1260016 |
| 3                      | <i>pgi</i>                  | Glucose-6-phosphate isomerase                             | 5.3.1.9   | CAP2UW1_2124                                 | BN11_460001                                  | BN10_120038                | BN13_230004         | BN12_130067<br>BN12_1240008  |
| 4                      | <i>pfp</i>                  | Pyruvophosphate-fructose 6-phosphate 1-phosphotransferase | 2.7.1.90  | CAP2UW1_0237                                 | BN11_60019                                   | BN10_1000001               | BN13_610027         | BN12_2620011                 |
| 5                      | <i>fba</i>                  | Fructose bisphosphate aldolase                            | 4.1.2.13  | CAP2UW1_3196                                 | BN11_1240007<br>BN11_1780008<br>BN11_1780010 | BN10_650045                | BN13_810016         | BN12_4140009                 |
| 6                      | <i>tpiA</i>                 | Triosephosphate isomerase                                 | 5.3.1.1   | CAP2UW1_0486                                 | BN11_460016                                  | BN10_1080001               | BN13_770012         | BN12_130060                  |
| 7                      | <i>gapA</i> ,<br><i>gad</i> | Glyceraldehyde-3-phosphate dehydrogenase A                | 1.2.1.12  | CAP2UW1_0822<br>CAP2UW1_2669                 | BN11_460018                                  | BN10_810036                | BN13_770014         | BN12_130058                  |
| 8                      | <i>pgk</i>                  | Phosphoglycerate kinase                                   | 2.7.2.3   | CAP2UW1_0487                                 | BN11_460017                                  | BN10_810037                | BN13_770013         | BN12_130059                  |
| 9                      | <i>gpmA</i>                 | Phosphoglyceromutase 1                                    | 5.4.2.1   | CAP2UW1_0408<br>CAP2UW1_1301                 | BN11_3920001                                 | BN10_890010                | BN13_670041         | BN12_2660015                 |
| 9                      | <i>gpmB</i>                 | Phosphoglyceromutase                                      | 5.4.2.1   | CAP2UW1_0305                                 | -                                            | BN10_310002<br>BN10_470001 | -                   | -                            |
| 10                     | <i>eno</i>                  | Phosphopyruvate hydratase                                 | 4.2.1.11  | CAP2UW1_3325<br>CAP2UW1_2666                 | BN11_3710002                                 | BN10_920026                | BN13_490015         | BN12_840010<br>BN12_2450005  |
| 11                     | <i>pyk</i>                  | Pyruvate kinase                                           | 2.7.1.40  | CAP2UW1_0821<br>CAP2UW1_1890<br>CAP2UW1_1860 | BN11_380006                                  | BN10_860019                | BN13_190018         | BN12_4080005                 |
| 12                     | <i>edd</i>                  | 6-phosphogluconate dehydrase                              | 4.2.1.12  | -                                            | -                                            | -                          | -                   | -                            |
| 13                     | <i>eda</i>                  | 2-dehydro-3-deoxy-phosphogluconate aldolase               | 4.1.2.14  | -                                            | -                                            | -                          | -                   | -                            |
| <b>Glcconeogenesis</b> |                             |                                                           |           |                                              |                                              |                            |                     |                              |
| 14                     | <i>g6pc</i>                 | Glucose 6-phosphatase                                     | 3.1.3.9   | -                                            | -                                            | -                          | -                   | -                            |
| 15                     | <i>fbp</i>                  | Fructose-1,6-bisphosphatase                               | 3.1.3.11  | CAP2UW1_0957<br>CAP2UW1_3072                 | BN11_320003<br>BN11_100009                   | -                          | BN13_810036         | BN12_2020004                 |

|                                            |                              |                                                            |          |                                                              |                                             |                                                          |                                            |                             |
|--------------------------------------------|------------------------------|------------------------------------------------------------|----------|--------------------------------------------------------------|---------------------------------------------|----------------------------------------------------------|--------------------------------------------|-----------------------------|
| 16                                         | <i>ppdk</i>                  | Pyruvate, phosphate dikinase                               | 2.7.9.1  | CAP2UW1_2514                                                 | BN11_650029                                 | BN10_820042                                              | BN13_1220006                               | BN12_2730003                |
| 17                                         | <i>pgm</i>                   | Phosphoglucomutase                                         | 5.4.2.2  | CAP2UW1_2125<br>CAP2UW1_2943                                 | BN11_960004                                 | BN10_570002                                              | BN13_100074                                | BN12_350017<br>BN12_2840007 |
| <b>Glycogen synthesis / glycogenolysis</b> |                              |                                                            |          |                                                              |                                             |                                                          |                                            |                             |
| 18                                         | <i>glgC</i>                  | Glucose-1-phosphate adenylyltransferase                    | 2.7.7.27 | CAP2UW1_2126                                                 | BN11_850014<br>BN11_1180006                 | BN10_1080041                                             | BN13_110004                                | BN12_520006                 |
| 19                                         | <i>glgA</i>                  | Starch (bacterial glycogen) synthase                       | 2.4.1.21 | CAP2UW1_2661                                                 | BN11_850013                                 | BN10_1080042                                             | BN13_110005                                | BN12_520007                 |
| 20                                         | <i>glgB</i>                  | 1,4-alpha-glucan-branching enzyme                          | 2.4.1.18 | CAP2UW1_0256<br>CAP2UW1_2061                                 | BN11_960002                                 | BN10_570003                                              | BN13_100073                                | BN12_350019                 |
| 21                                         | <i>glgP</i> ,<br><i>glgY</i> | Glycogen phosphorylase                                     | 2.4.1.1  | CAP2UW1_2663<br>CAP2UW1_0255                                 | BN11_240010<br>BN11_750005                  | BN10_570005                                              | BN13_630008                                | BN12_350025                 |
| 22                                         | <i>glgX</i>                  | Glycogen debranching enzyme                                | 3.2.1.-  | CAP2UW1_0257<br>CAP2UW1_1590                                 | BN11_3200008<br>BN11_260009                 | BN10_570008<br>BN10_530007                               | BN13_100069<br>BN13_130033                 | BN12_350027<br>BN12_2780004 |
| 23                                         | <i>malQ</i>                  | 4-alpha-glucanotransferase                                 | 2.4.1.25 | CAP2UW1_1512                                                 | BN11_1110012                                | BN10_130032                                              | BN13_140037                                | BN12_420008                 |
| <b>Pyruvate metabolism</b>                 |                              |                                                            |          |                                                              |                                             |                                                          |                                            |                             |
| 24                                         | <i>ppc</i> ,<br><i>pepC</i>  | Phosphoenolpyruvate carboxylase                            | 4.1.1.31 | CAP2UW1_1517                                                 | BN11_1780015                                | -                                                        | BN13_810027                                | -                           |
| 25                                         | <i>ppck</i> ,<br><i>pckG</i> | Phosphoenolpyruvate carboxykinase                          | 4.1.1.32 | CAP2UW1_0771<br>CAP2UW1_1298                                 | BN11_1510003                                | BN10_440007<br>BN10_640016<br>BN10_640015                | BN13_590023                                | BN12_960007<br>BN12_3980003 |
| 26                                         | <i>pyrS</i>                  | Pyruvate synthetase                                        | 1.2.7.1  | CAP2UW1_2510<br>CAP2UW1_2511<br>CAP2UW1_2512<br>CAP2UW1_2513 | BN11_10045<br>BN11_870002<br>BN11_10046     | BN10_460016<br>BN10_460015                               | BN13_90018<br>BN13_90019                   | BN12_460011<br>BN12_460012  |
| 27                                         | <i>pdhA</i>                  | Pyruvate dehydrogenase E1 component, alpha subunit         | 1.2.4.1  | CAP2UW1_1838                                                 | BN11_20027<br>BN11_530003                   | BN10_50014<br>BN10_20004                                 | BN13_70027**<br>BN13_70028**<br>BN13_50043 | BN12_590003<br>BN12_2860013 |
|                                            | <i>pdhB</i>                  | Pyruvate dehydrogenase E1 component, beta subunit          | 1.2.4.1  | -                                                            | BN11_20028                                  | BN10_50013                                               | BN13_70026                                 | BN12_590002                 |
|                                            | <i>pdhC</i>                  | Pyruvate dehydrogenase E2 component                        | 2.3.1.12 | CAP2UW1_1839                                                 | BN11_410014*<br>BN11_20029*                 | BN10_50012                                               | BN13_70025                                 | BN12_70001*<br>BN12_590001* |
|                                            | <i>lpd</i>                   | Pyruvate/2-oxoglutarate dehydrogenase complex E3 component | 1.8.1.4  | CAP2UW1_2390<br>CAP2UW1_1840                                 | BN11_160019<br>BN11_5240005<br>BN11_1020002 | BN10_670011<br>BN10_290002<br>BN10_470027<br>BN10_420003 | BN13_160031                                | BN12_160025<br>BN12_3350004 |
| 28                                         | <i>maeA</i>                  | NAD-dependent malic enzyme                                 | 1.1.1.38 | CAP2UW1_0018<br>CAP2UW1_0772                                 | BN11_10003                                  | BN10_1380009                                             | BN13_30063                                 | BN12_2240010                |

|                  |                             |                                           |          |                                              |                                |                            |                                |                                                         |
|------------------|-----------------------------|-------------------------------------------|----------|----------------------------------------------|--------------------------------|----------------------------|--------------------------------|---------------------------------------------------------|
|                  | <i>maeB</i>                 | NAD-dependent malic enzyme                | 1.1.1.40 | -                                            | -                              | BN10_1730033               | BN13_140048                    | BN12_2030016<br>BN12_560003                             |
| <b>TCA cycle</b> |                             |                                           |          |                                              |                                |                            |                                |                                                         |
| 29               | <i>gltA</i>                 | Citrate synthase                          | 2.3.3.1  | CAP2UW1_3105<br>CAP2UW1_2387<br>CAP2UW1_3882 | BN11_3330001                   | BN10_510003<br>BN10_130013 | BN13_430023<br>BN13_960005     | BN12_620003<br>BN12_2120005                             |
| 30               | <i>acnA</i> ,<br><i>acn</i> | Aconitase hydratase 1                     | 4.2.1.3  | CAP2UW1_3037                                 | BN11_1740002                   | BN10_500019<br>BN10_960013 | BN13_130052                    | BN12_40012<br>BN12_310013<br>BN12_500016<br>BN12_530005 |
| 31               | <i>icd</i>                  | Isocitrate dehydrogenase                  | 1.1.1.42 | CAP2UW1_0663<br>CAP2UW1_0664                 | BN11_230008                    | BN10_520081                | BN13_1860003                   | BN12_2390002                                            |
| 32               | <i>sucA</i>                 | 2-oxoglutarate dehydrogenase (E1 subunit) | 1.2.4.2  | CAP2UW1_2388                                 | BN11_1110001                   | BN10_1470003               | BN13_140055                    | BN12_2090005                                            |
|                  | <i>sucB</i>                 | 2-oxoglutarate dehydrogenase (E2 subunit) | 2.3.1.61 | CAP2UW1_2389<br>CAP2UW1_1839                 | BN11_2160001*<br>BN11_1020001* | BN10_290001<br>BN10_300104 | BN13_1010002*<br>BN13_1020010* | BN12_3350003*<br>BN12_3700001*                          |
| 33               | <i>sucC</i>                 | Succinyl-CoA synthetase beta subunit      | 6.2.1.5  | CAP2UW1_0656                                 | BN11_1040004                   | BN10_1120013               | BN13_170042                    | BN12_40013<br>BN12_2420006                              |
|                  | <i>sucD</i>                 | Succinyl-CoA synthetase alpha subunit     | 6.2.1.5  | CAP2UW1_0657                                 | BN11_1040003                   | BN10_1120012               | BN13_170043                    | BN12_40014<br>BN12_2420007                              |
| 34               | <i>sdhA</i>                 | Succinate dehydrogenase                   | 1.3.5.1  | CAP2UW1_2384                                 | BN11_890011                    | BN10_630021                | BN13_440025                    | BN12_1010007                                            |
|                  | <i>sdhB</i>                 | Succinate dehydrogenase                   | 1.3.5.1  | CAP2UW1_2385                                 | BN11_890010                    | BN10_630022                | BN13_440024                    | BN12_1010006                                            |
|                  | <i>sdhC</i>                 | Succinate dehydrogenase                   | 1.3.5.1  | CAP2UW1_2382                                 | BN11_890012****                | BN10_630020****            | BN13_440026****                | BN12_1010008****                                        |
|                  | <i>sdhD</i>                 | Succinate dehydrogenase                   | 1.3.5.1  | CAP2UW1_2383                                 | -                              | -                          | -                              | -                                                       |
| 34A              | <i>frdA</i>                 | Fumarate reductase                        | 1.3.99.1 | CAP2UW1_0926                                 | -                              | -                          | -                              | -                                                       |
|                  | <i>frdB</i>                 | Fumarate reductase                        | 1.3.99.1 | CAP2UW1_0925                                 | -                              | -                          | -                              | -                                                       |
|                  | <i>frdC</i>                 | Fumarate reductase                        | 1.3.99.1 | CAP2UW1_0924                                 | -                              | -                          | -                              | -                                                       |
|                  | <i>frdD</i>                 | Fumarate reductase                        | 1.3.99.1 | CAP2UW1_0923                                 | -                              | -                          | -                              | -                                                       |
| 35               | <i>fumA</i>                 | Fumarase (class I)                        | 4.2.1.2  | CAP2UW1_3757                                 | BN11_2550014                   | BN10_130062                | BN13_150051                    | BN12_630005                                             |
|                  | <i>fumC</i>                 | Fumarase (class II)                       | 4.2.1.2  | -                                            | BN11_3370004                   | BN10_140005                | BN13_1500007                   | BN12_1610006                                            |
| 36               | <i>mdh</i>                  | Malate dehydrogenase                      | 1.1.1.37 | CAP2UW1_2380                                 | BN11_560002                    | BN10_520084                | BN13_510009                    | BN12_1520001                                            |
| 37               | <i>actP</i>                 | Acetate transporter                       | -        | CAP2UW1_1608                                 | BN11_1230008                   | BN10_580035                | BN13_620010                    | BN12_1520004                                            |

|                                 |                              |                                                                  |                        |                                                                              |                                                              |                                                                          |                                                            |                                                                            |
|---------------------------------|------------------------------|------------------------------------------------------------------|------------------------|------------------------------------------------------------------------------|--------------------------------------------------------------|--------------------------------------------------------------------------|------------------------------------------------------------|----------------------------------------------------------------------------|
| 38                              | <i>acs</i> ,<br><i>acsA</i>  | Acetyl-CoA synthetase                                            | 6.2.1.1                | CAP2UW1_3755                                                                 | BN11_1230011                                                 | BN10_580041                                                              | BN13_390014                                                | BN12_1570008                                                               |
| 39                              | <i>ackA</i>                  | Acetate kinase                                                   | 2.7.2.1                | CAP2UW1_1515                                                                 | BN11_1350008                                                 | BN10_560037                                                              | BN13_910016                                                | BN12_1100005                                                               |
| 40                              | <i>pta</i>                   | Phosphotransacetylase                                            | 2.3.1.8                | CAP2UW1_1002                                                                 | BN11_1350009                                                 | BN10_560038                                                              | BN13_910015                                                | BN12_1100006<br>BN12_1960009                                               |
| <b>PHA synthesis</b>            |                              |                                                                  |                        |                                                                              |                                                              |                                                                          |                                                            |                                                                            |
| 41                              | <i>phaA</i>                  | Acetyl-CoA acetyltransferase                                     | 2.3.1.9                | CAP2UW1_2144<br>CAP2UW1_3189<br>CAP2UW1_3458<br>CAP2UW1_3463<br>CAP2UW1_2344 | BN11_1860009<br>BN11_1350015<br>BN11_1360003<br>BN11_4910007 | BN10_600014<br>BN10_1170012<br>BN10_920035<br>BN10_590081<br>BN10_810005 | BN13_460011<br>BN13_130025<br>BN13_250034<br>BN13_370004   | BN12_3170003<br>BN12_100011<br>BN12_800001<br>BN12_1200011<br>BN12_1580014 |
| 42                              | <i>phaB</i>                  | Acetoacetyl-CoA reductase                                        | 1.1.1.36               | CAP2UW1_3919                                                                 | BN11_260008                                                  | BN10_530006                                                              | BN13_100014<br>BN13_680001<br>BN13_1670003<br>BN13_2020001 | BN12_100010<br>BN12_2780005<br>BN12_3210004                                |
| 43                              | <i>phaC</i>                  | PHA synthase                                                     | 2.3.1.-                | CAP2UW1_3185                                                                 | -                                                            | -                                                                        | -                                                          | BN12_40008<br>BN12_270028                                                  |
| 43a                             | <i>phaZ</i>                  | poly(3-hydroxyalkanoate) depolymerase                            | 3.1.1.-                |                                                                              | -                                                            | -                                                                        | -                                                          | BN12_270026<br>BN12_40010                                                  |
| <b>Glyoxylate shunt</b>         |                              |                                                                  |                        |                                                                              |                                                              |                                                                          |                                                            |                                                                            |
| 44                              | <i>icl</i>                   | Isocitrate lyase                                                 | 4.1.3.1                | CAP2UW1_3854                                                                 | -                                                            | -                                                                        | -                                                          | -                                                                          |
| 45                              | <i>mas</i>                   | Malate synthase                                                  | 2.3.3.9                | CAP2UW1_3850                                                                 | -                                                            | -                                                                        | -                                                          | BN12_2030015                                                               |
| <b>Polyphosphate metabolism</b> |                              |                                                                  |                        |                                                                              |                                                              |                                                                          |                                                            |                                                                            |
| 46                              | <i>pap</i>                   | Polyphosphate AMP phosphotransferase                             | -                      | CAP2UW1_4020                                                                 | BN11_1900002                                                 | BN10_810018                                                              | BN13_130014                                                | BN12_1580002                                                               |
| 47                              | <i>adk</i>                   | Adenylate kinase                                                 | 2.7.4.3                | CAP2UW1_0385                                                                 | BN11_1880019                                                 | BN10_760003                                                              | BN13_740046                                                | BN12_1160003                                                               |
| 48a                             | <i>ppk1</i>                  | Polyphosphate kinase 1                                           | 2.7.4.1                | CAP2UW1_1063                                                                 | BN11_1730011                                                 | BN10_1260013                                                             | BN13_670019                                                | BN12_1710006                                                               |
| 48b                             | <i>ppk2</i>                  | Polyphosphate kinase 2                                           | -                      | CAP2UW1_2309                                                                 | BN11_450014<br>BN11_2620003                                  | BN10_120015                                                              | BN13_690007<br>BN13_180056                                 | BN12_1600008                                                               |
| 49                              | <i>ppx</i>                   | Exopolyphosphatase Ppx / GppA phosphatase                        | 3.6.1.11 /<br>3.6.1.40 | CAP2UW1_0060                                                                 | BN11_2840003                                                 | BN10_920029                                                              | BN13_490018                                                | BN12_1590006                                                               |
| 50                              | <i>pit</i> ,<br><i>pitA</i>  | Low-affinity inorganic phosphate transporter                     | -                      | CAP2UW1_3788<br>CAP2UW1_2085                                                 | BN11_90014                                                   | BN10_1260007<br>BN10_690020                                              | BN13_370011<br>BN13_670013                                 | BN12_1710012<br>BN12_2400006                                               |
| 51                              | <i>pstS</i> ,<br><i>phoS</i> | Phosphate ABC transporter subunit, periplasmic-binding component | -                      | CAP2UW1_2005<br>CAP2UW1_2007                                                 | BN11_1730004                                                 | BN10_1260011                                                             | BN13_670014                                                | BN12_1710008                                                               |
|                                 | <i>pstC</i> ,<br><i>pho</i>  | Phosphate ABC transporter subunit,                               | -                      | CAP2UW1_1749<br>CAP2UW1_2004                                                 | BN11_1730005                                                 | BN10_1260010                                                             | BN13_670015                                                | BN12_1710009                                                               |

|                             |                   |                                                               |          |                              |                                            |                                            |                                                         |                                                                                                                                       |
|-----------------------------|-------------------|---------------------------------------------------------------|----------|------------------------------|--------------------------------------------|--------------------------------------------|---------------------------------------------------------|---------------------------------------------------------------------------------------------------------------------------------------|
|                             | <i>W</i>          | trans-membrane component                                      |          |                              |                                            |                                            |                                                         |                                                                                                                                       |
|                             | <i>pstA, phoT</i> | Phosphate ABC transporter subunit, trans-membrane component   | -        | CAP2UW1_1750<br>CAP2UW1_2003 | BN11_1730006                               | BN10_1260009                               | BN13_670016                                             | BN12_1710010                                                                                                                          |
|                             | <i>pstB, phoT</i> | Phosphate ABC transporter subunit, ATP-binding component      | -        | CAP2UW1_2002                 | BN11_1730007                               | BN10_1260008                               | BN13_670017                                             | BN12_1710011                                                                                                                          |
|                             | <i>phoU</i>       | Phosphate concentration transducer of pho regulon (phoR/phoB) | -        | CAP2UW1_1748<br>CAP2UW1_1995 | BN11_3350003                               | BN10_890008                                | BN13_1100006                                            | BN12_2660016                                                                                                                          |
|                             | <i>phoS</i>       | Two-component system, Sensor kinase                           | -        | CAP2UW1_1997 (phoR)          | BN11_2330005                               | BN10_1400002                               | BN13_610019                                             | BN12_2400021                                                                                                                          |
|                             | <i>phoR</i>       | Two-component system, Response regulator                      | -        | CAP2UW1_1996 (phoB)          | BN11_2330006                               | BN10_1400001                               | BN13_610018                                             | BN12_2400022                                                                                                                          |
| <b>Glucose fermentation</b> |                   |                                                               |          |                              |                                            |                                            |                                                         |                                                                                                                                       |
| 52                          | <i>gluP</i>       | Putative glucose permease                                     | -        | -                            | BN11_770005<br>BN11_900006                 | BN10_10018                                 | BN13_150007                                             | BN12_430018                                                                                                                           |
| 53                          | <i>pyc, pc</i>    | Pyruvate carboxylase                                          | 6.4.1.1  | -                            | BN11_1480010                               | BN10_1550002<br>BN10_420010                | BN13_1400004                                            | BN12_2240005<br>BN12_330003                                                                                                           |
| 54                          | <i>oadA</i>       | Oxaloacetate decarboxylase                                    | 4.1.1.3  | -                            | -                                          | -                                          | -                                                       | -                                                                                                                                     |
| 55                          |                   | Pyruvate decarboxylase                                        | 4.1.1.1  | -                            | -                                          | -                                          | -                                                       | -                                                                                                                                     |
| 56                          | <i>mhpF</i>       | Acetaldehyde dehydrogenase                                    | 1.2.1.10 | -                            | BN11_400013                                | -                                          | -                                                       | -                                                                                                                                     |
| 57                          | <i>aldA, dhaS</i> | Aldehyde dehydrogenase                                        | 1.2.1.3  | -                            | BN11_770008<br>BN11_4620004<br>BN11_450008 | BN10_1190008<br>BN10_610016<br>BN10_840022 | BN13_10041<br>BN13_100015<br>BN13_150009                | BN12_10016<br>BN12_80016<br>BN12_90004<br>BN12_690005<br>BN12_4030037                                                                 |
| 58                          | <i>adh</i>        | Alcohol dehydrogenase                                         | 1.1.1.1  | -                            | BN11_70023<br>BN11_1350013                 | BN10_1730038                               | BN13_10017<br>BN13_30062<br>BN13_400008<br>BN13_1890012 | BN12_10040<br>BN12_40006<br>BN12_300019<br>BN12_320011<br>BN12_660002<br>BN12_2240007<br>BN12_2310002<br>BN12_2590011<br>BN12_4190010 |
| 59                          | <i>ldh</i>        | Lactate dehydrogenase                                         | 1.1.1.27 | -                            | -                                          | BN10_10012                                 | -                                                       | BN12_360018<br>BN12_1310011                                                                                                           |

|                              |                        |                                           |                        |              |                                              |              |                            |                                                                           |
|------------------------------|------------------------|-------------------------------------------|------------------------|--------------|----------------------------------------------|--------------|----------------------------|---------------------------------------------------------------------------|
| 60                           | <i>pfl</i>             | Pyruvate formate lyase                    | 2.3.1.54               | -            | -                                            | -            | -                          | -                                                                         |
| <b>Amino acid metabolism</b> |                        |                                           |                        |              |                                              |              |                            |                                                                           |
| 61                           | <i>gadB</i>            | Glutamate decarboxylase                   | 4.1.1.15               | -            | BN11_80018                                   | BN10_1380007 | BN13_550019                | BN12_240005                                                               |
| 62                           | <i>gdhA</i>            | Glutamate dehydrogenase, NADP-specific    | 1.4.1.2                | -            | BN11_2200006                                 | BN10_1250009 | BN13_550022                | BN12_1760006                                                              |
|                              | <i>gdhB</i>            | Glutamate dehydrogenase, NAD-specific     |                        | -            | BN11_1560002                                 | BN10_520008  | BN13_40022                 | BN12_850006                                                               |
| 63                           | <i>gabT</i>            | 4-aminobutyrate aminotransferase          | 2.6.1.19               | -            | BN11_420012<br>BN11_880003                   | BN10_840015  | BN13_1040006               | BN12_80014<br>BN12_530018<br>BN12_1720007                                 |
| 64                           | <i>gabD</i>            | Succinate-semialdehyde dehydrogenase      | 1.2.1.16 /<br>1.2.1.24 | -            | BN11_1700005<br>BN11_3600001<br>BN11_4990011 | BN10_840014  | BN13_170011<br>BN13_180036 | BN12_80013<br>BN12_450014<br>BN12_2260006<br>BN12_3980002<br>BN12_4030024 |
| 65                           | <i>gluD</i>            | Glutamate transporter                     | -                      | -            | BN11_1420006                                 | BN10_900019  | BN13_150067                | BN12_300015                                                               |
|                              | <i>gluC</i>            |                                           |                        | -            | BN11_1420007                                 | BN10_900018  | BN13_150066                | BN12_300016                                                               |
|                              | <i>gluB</i>            |                                           |                        | -            | BN11_1420008                                 | BN10_900017  | BN13_150065                | BN12_300017                                                               |
|                              | <i>gltL /<br/>gluA</i> |                                           |                        | -            | BN11_1420009                                 | BN10_900016  | BN13_150064                | BN12_300018                                                               |
| 66                           | <i>purA</i>            | Adenylosuccinate synthetase               | 6.3.4.4                | -            | BN11_1780005                                 | BN10_650042  | BN13_810011                | BN12_4140012                                                              |
| 67                           | <i>purB</i>            | Adenylosuccinate lyase                    | 4.3.2.2                | -            | BN11_320008                                  | BN10_1390015 | BN13_10018                 | BN12_2110004                                                              |
| 68                           | <i>argG</i>            | Argininosuccinate synthetase              | 6.3.4.5                | -            | BN11_530007                                  | BN10_20003   | BN13_1030007               | BN12_2860012                                                              |
| 69                           | <i>argH</i>            | Argininosuccinate lyase                   | 4.3.2.1                | -            | BN11_110021                                  | BN10_1060008 | BN13_1240007               | BN12_1250002                                                              |
| 70                           | <i>nadB</i>            | L-aspartate oxidase                       | 1.4.3.16               | -            | BN11_120005                                  | BN10_1210020 | BN13_600021                | BN12_1320003                                                              |
| 71                           | <i>aspC</i>            | Aspartate aminotransferase                | 2.6.1.1                | -            | BN11_60012                                   | BN10_680055  | BN13_390063                | -                                                                         |
| 72                           | <i>sdaA</i>            | L-serine deaminase                        | 4.3.1.17               | CAP2UW1_0154 | -                                            | -            | -                          | BN12_1920002                                                              |
| 73                           | <i>aspA</i>            | Aspartate ammonia-lyase                   | 4.3.1.1                | CAP2UW1_3016 | -                                            | BN10_360016  | -                          | BN12_790014<br>BN12_1190012                                               |
| 74                           | <i>rocD</i>            | Ornithine--oxo-glutarate aminotransferase | 2.6.1.13               | -            | BN11_240015                                  | BN10_300020  | -                          | -                                                                         |
| 75                           | <i>rocA</i>            | 1-pyrroline-5-carboxylate dehydrogenase   | 1.5.1.12               | -            | BN11_2640003                                 | BN10_520012  | -                          | BN12_360020<br>BN12_1040003<br>BN12_1300009                               |



|    |             |                                                                |                   |              |                            |              |                             |                                           |
|----|-------------|----------------------------------------------------------------|-------------------|--------------|----------------------------|--------------|-----------------------------|-------------------------------------------|
| 76 | <i>arcA</i> | Arginine deiminase                                             | 3.5.3.6           | -            | -                          | -            | -                           | -                                         |
| 77 | <i>arcC</i> | Carbamate kinase                                               | 2.7.2.2           | -            | BN11_80010                 | BN10_430006  | -                           | -                                         |
| 78 | <i>ArgF</i> | Ornithine carbamoyltransferase                                 | 2.1.3.3           | -            | BN11_110023                | BN10_1060010 | BN13_1240005                | BN12_1250004                              |
| 79 | <i>cysA</i> | Cysteine desulhydratase                                        | 4.4.1.1 / 4.4.1.8 | -            | BN11_2610015               | BN10_590012  | BN13_30114<br>BN13_720020   | BN12_10043<br>BN12_500015<br>BN12_2960002 |
| 80 | <i>dat</i>  | D-alanine aminotransferase                                     | 2.6.1.21          | -            | BN11_4730017               | -            | BN13_400013<br>BN13_1890008 | BN12_210018                               |
| 81 | <i>ald</i>  | L-alanine dehydrogenase                                        | 1.4.1.1           | -            | BN11_2610026               | BN10_590046  | BN13_30124                  | BN12_2820008                              |
| 82 | <i>hisC</i> | Histidinol-phosphate aminotransferase                          | 2.6.1.9 / 2.6.1.5 | CAP2UW1_2902 | BN11_20022<br>BN11_2570004 | BN10_50015   | BN13_70032                  | BN12_590005                               |
| 83 | <i>ilvE</i> | Branched chain amino acid aminotransferase                     | 2.6.1.42          | CAP2UW1_2938 | BN11_100008                | BN10_610010  | BN13_100011                 | BN12_660012                               |
| 84 | <i>tdc</i>  | Threonine dehydratase                                          | 4.3.1.19          | CAP2UW1_0262 | BN11_2110005               | BN10_920048  | BN13_1660008                | BN12_80006<br>BN12_2380015                |
| 85 | <i>tdh</i>  | Threonine 3-dehydrogenase                                      | 1.1.1.103         | -            | BN11_4860005               | BN10_580033  | BN13_420085                 | -                                         |
| 86 | <i>itaE</i> | Threonine aldolase                                             | 4.1.2.5           | -            | BN11_2300004               | BN10_360038  | BN13_230009<br>BN13_550015  | BN12_1940002                              |
| 87 | <i>kbl</i>  | 2-amino-3-ketobutyrate CoA ligase (glycine acetyl transferase) | 2.3.1.29          | -            | BN11_4860006               | BN10_580030  | BN13_420086                 | -                                         |
| 88 | <i>glyA</i> | Glycine/serine hydroxymethyltransferase                        | 2.1.2.1           | CAP2UW1_1498 | BN11_1600013               | BN10_1140014 | BN13_300016                 | BN12_1150010<br>BN12_1190001              |
| 89 | <i>serB</i> | Phosphoserine phosphatase                                      | 3.1.3.3           | CAP2UW1_3895 | BN11_850015                | BN10_1080040 | BN13_110003                 | BN12_520005                               |
| 90 | <i>serC</i> | Phosphoserine aminotransferase                                 | 2.6.1.52          | CAP2UW1_2564 | BN11_2330020               | BN10_510004  | BN13_960008                 | BN12_620004                               |
| 91 | <i>serA</i> | D-3-phosphoglycerate dehydrogenase                             | 1.1.1.95          | -            | BN11_100006                | BN10_330004  | BN13_100025                 | BN12_540012<br>BN12_660008                |
| 92 | <i>gcvP</i> | Glycine dehydrogenase (decarboxylating)                        | 1.4.4.2           | CAP2UW1_1958 | BN11_2610002               | BN10_590002  | BN13_30103                  | BN12_500004                               |
| 93 | <i>gcvT</i> | Aminomethyltransferase                                         | 2.1.2.10          | CAP2UW1_1960 | BN11_1020004               | BN10_290005  | BN13_1020008                | BN12_1500012                              |
| 94 | <i>gcvH</i> | Glycine cleavage complex lipoylprotein                         |                   | CAP2UW1_1959 | BN11_2610009               | BN10_590007  | BN13_30109                  | BN12_500010                               |
| 95 | <i>hutI</i> | Imidazolonepropionase                                          | 3.5.2.7           | -            | BN11_4500011*              | BN10_230040  | BN13_20016                  | BN12_1270004                              |
| 96 | <i>hutU</i> | Urocanase                                                      | 4.2.1.49          | -            | BN11_1810004               | BN10_230033  | BN13_20019                  | BN12_1360004                              |
| 97 | <i>hutH</i> | histidine ammonia-lyase                                        | 4.3.1.3           | -            | BN11_3310009               | BN10_230032  | BN13_20021                  | BN12_1360006                              |

| Nitrogen metabolism |             |                                                                  |           |                                                                                                              |                                                                                                                                 |                                                                                                                        |                                            |                                                                           |
|---------------------|-------------|------------------------------------------------------------------|-----------|--------------------------------------------------------------------------------------------------------------|---------------------------------------------------------------------------------------------------------------------------------|------------------------------------------------------------------------------------------------------------------------|--------------------------------------------|---------------------------------------------------------------------------|
| 98                  | <i>narI</i> | Nitrate reductase (gamma subunit)                                | 1.7.99.4  | -                                                                                                            | BN11_1940006                                                                                                                    | BN10_750007                                                                                                            | BN13_950001*                               | BN12_300023<br>BN12_4190006                                               |
|                     | <i>narJ</i> | Nitrate reductase (delta subunit)                                | 1.7.99.4  | -                                                                                                            | BN11_1940007                                                                                                                    | BN10_750006                                                                                                            | BN13_950002                                | BN12_300022<br>BN12_4190007                                               |
|                     | <i>narH</i> | Nitrate reductase (beta subunit)                                 | 1.7.99.4  | -                                                                                                            | BN11_1940008                                                                                                                    | BN10_750005                                                                                                            | BN13_950003                                | BN12_300021<br>BN12_4190008                                               |
|                     | <i>narG</i> | Nitrate reductase (alpha subunit)                                | 1.7.99.4  | -                                                                                                            | BN11_1940009                                                                                                                    | BN10_750004                                                                                                            | BN13_950004                                | BN12_300020<br>BN12_4190009                                               |
| 99                  | <i>narT</i> | Nitrate/nitrite transporter (putative nitrate transporter)       |           | -                                                                                                            | BN11_1940011                                                                                                                    | BN10_750002                                                                                                            | BN13_1500003                               | BN12_4190005                                                              |
| 100                 | <i>narU</i> | Nitrate/nitrite transporter (putative nitrite extrusion protein) |           | -                                                                                                            | BN11_1940012                                                                                                                    | BN10_750001                                                                                                            | BN13_1500004                               | BN12_600017                                                               |
| 101                 | <i>nirB</i> | Nitrite reductase, large subunit                                 | 1.7.1.4   | CAP2UW1_2777                                                                                                 | -                                                                                                                               | -                                                                                                                      | -                                          | BN12_2970001                                                              |
|                     | <i>nirD</i> | Nitrite reductase, small subunit                                 | 1.7.1.4   | CAP2UW1_2778                                                                                                 | -                                                                                                                               | -                                                                                                                      | -                                          | BN12_2970003                                                              |
| 102                 | <i>napA</i> | Nitrate reductase                                                |           | CAP2UW1_3906                                                                                                 | -                                                                                                                               | -                                                                                                                      | -                                          | BN12_510011                                                               |
| 103                 | <i>nirK</i> | Copper-containing nitrite reductase                              | 1.7.2.1   | -                                                                                                            | BN11_50002                                                                                                                      | BN10_250005*<br>BN10_830001*                                                                                           | BN13_500023*                               | BN12_3590002*                                                             |
| 104                 | <i>norB</i> | Nitric oxide reductase, subunit B***                             | 1.7.99.7  | -                                                                                                            | BN11_400018                                                                                                                     | -                                                                                                                      | -                                          | BN12_930010                                                               |
|                     | <i>norZ</i> | Nitric oxide reductase***                                        |           | CAP2UW1_2326                                                                                                 | BN11_400018                                                                                                                     | -                                                                                                                      | -                                          | BN12_930010                                                               |
| 105                 | <i>nosZ</i> | Nitrous oxide reductase                                          | 1.7.99.6  | CAP2UW1_3419                                                                                                 | -                                                                                                                               | -                                                                                                                      | -                                          | -                                                                         |
| Others              |             |                                                                  |           |                                                                                                              |                                                                                                                                 |                                                                                                                        |                                            |                                                                           |
| 106                 | <i>bhbd</i> | Beta-hydroxybutyryl-CoA dehydrogenase                            | 1.1.1.157 | CAP2UW1_2758                                                                                                 | BN11_1490005                                                                                                                    | BN10_1170022                                                                                                           | BN13_460001                                | BN12_1150036                                                              |
| 107                 | <i>ech</i>  | Enoyl-CoA hydratase                                              | 4.2.1.17  | CAP2UW1_1070<br>CAP2UW1_1141<br>CAP2UW1_1244<br>CAP2UW1_2373<br>CAP2UW1_2757<br>CAP2UW1_3194<br>CAP2UW1_4327 | BN11_1080042<br>BN11_540010<br>BN11_1830011<br>BN11_3200006<br>BN11_1740023*<br>BN11_1740024*<br>BN11_4910008<br>(fused enzyme) | BN10_1170022<br>BN10_650009<br>BN10_680003<br>BN10_570010<br>BN10_1250012<br>BN10_230009<br>BN10_810004 (fused enzyme) | BN13_100067<br>BN13_340004<br>BN13_1000008 | BN12_230002<br>BN12_350029<br>BN12_360002<br>BN12_1320012<br>BN12_1580015 |
| 108                 |             | Butyryl-CoA dehydrogenase                                        | 1.3.99.2  | Putative                                                                                                     | BN11_1200018<br>BN11_2390004                                                                                                    | BN10_1070026<br>BN10_30013                                                                                             | BN13_350002<br>BN13_430010<br>BN13_920006  | BN12_410006<br>BN12_410044<br>BN12_560002                                 |

|     |                  |                                                                   |                        |                              |                                            |                                           |                                            |                                                             |
|-----|------------------|-------------------------------------------------------------------|------------------------|------------------------------|--------------------------------------------|-------------------------------------------|--------------------------------------------|-------------------------------------------------------------|
| 109 |                  | Phosphobutylase                                                   | -                      | Putative                     | Putative                                   | Putative                                  | Putative                                   | Putative                                                    |
| 110 |                  | Butyrate kinase                                                   | -                      | Putative                     | Putative                                   | Putative                                  | Putative                                   | Putative                                                    |
| 111 |                  | Carboxytransferase                                                | -                      | CAP2UW1_1137                 | BN11_480016                                | BN10_520079<br>BN10_30011                 | BN13_860018<br>BN13_1400004                | BN12_410043<br>BN12_410033<br>BN12_3030001                  |
| 112 | <i>mcee</i>      | Methylmalonyl-CoA epimerase                                       | 5.1.99.1               | -                            | BN11_1860008                               | BN10_1170015                              | BN13_460008                                | BN12_3170002                                                |
| 113 | <i>mcm</i>       | Methylmalonyl-CoA mutase                                          | 5.4.99.2               | CAP2UW1_1139<br>CAP2UW1_2499 | BN11_440003<br>BN11_440002<br>BN11_2430007 | BN10_460061<br>BN10_130099<br>BN10_130100 | BN13_410005<br>BN13_740062<br>BN13_1280017 | BN12_350010<br>BN12_700009<br>BN12_700010*<br>BN12_1750001* |
| 114 | <i>rbcl</i>      | Ribulose-bisphosphate carboxylase                                 | 4.1.1.39               | CAP2UW1_0825                 | -                                          | -                                         | -                                          | -                                                           |
| 115 | <i>glpX-SEBP</i> | Fructose-1,6-bisphosphatase II / Sedoheptulose-1,7-bisphosphatase | 3.1.3.11 /<br>3.1.3.37 | CAP2UW1_0957<br>CAP2UW1_3072 | BN11_320003<br>BN11_100009                 | BN10_1240008                              | Putative                                   | Putative                                                    |
| 116 | <i>tkt</i>       | Transketolase                                                     | 2.2.1.1                | CAP2UW1_0959<br>CAP2UW1_0823 | BN11_460010                                | BN10_1080008                              | BN13_770004                                | BN12_130069                                                 |
| 117 | <i>rpi</i>       | Ribose-5-phosphate isomerase                                      | 5.3.1.6                | CAP2UW1_4017                 | BN11_1000008                               | BN10_940018                               | BN13_680013                                | BN12_1070010                                                |
| 118 | <i>prk</i>       | Phosphoribulokinase                                               | 2.7.1.19               | CAP2UW1_0958                 | -                                          | -                                         | -                                          | -                                                           |

\* Fragments due to contig breaks. The fragment may together with another fragment comprise a complete gene.

\*\*Pseudogenes

\*\*\* *norB* and *norZ* have amino acid identity of 90%. Therefore, this sequence may be either of these sequences.

\*\*\*\*This gene putatively codes for both *sdhC* and *sdhD*
